# Supplementary material
Source: Springer Nature journal article supplement (https://www.springerprofessional.de/resource/supplementary/40493_2013_7_MOESM3_ESM.pdf/11899618)

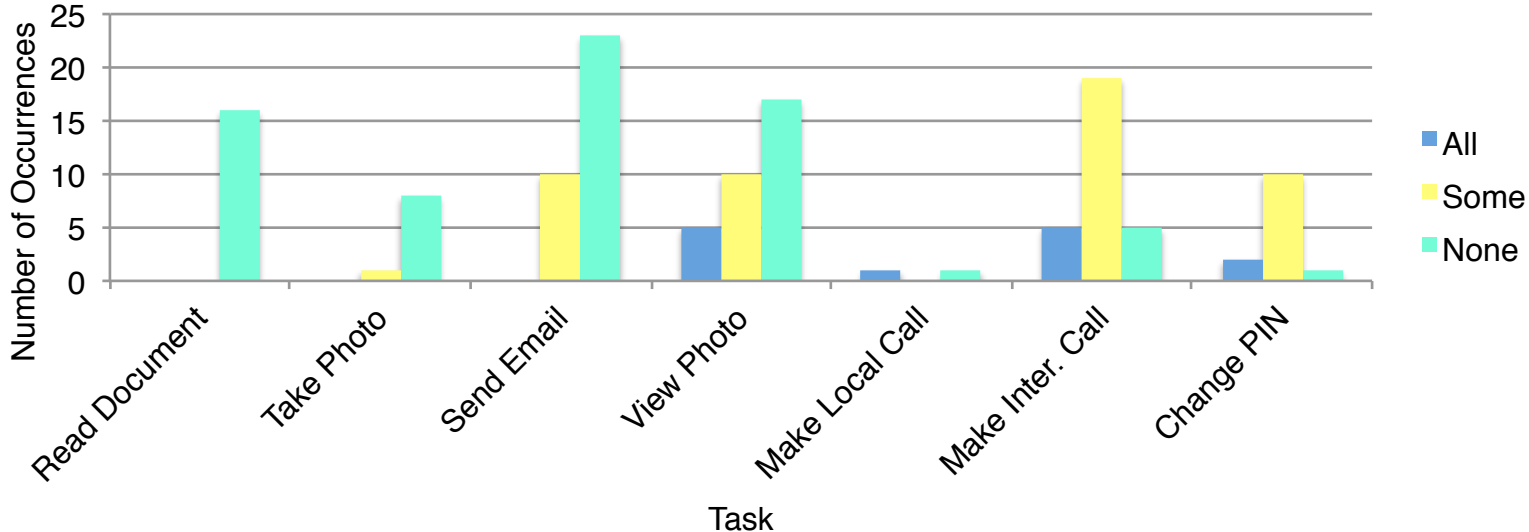

Supplement: MOESM3 [file 11899618]
